# Supplementary material for: Combination RSL3 Treatment Sensitizes Ferroptosis- and EGFR-Inhibition-Resistant HNSCCs to Cetuximab
Source: MDPI journal article supplement (doi:10.3390/ijms23169014), 2022-08-12
Supplement: s1 [file s1]

A

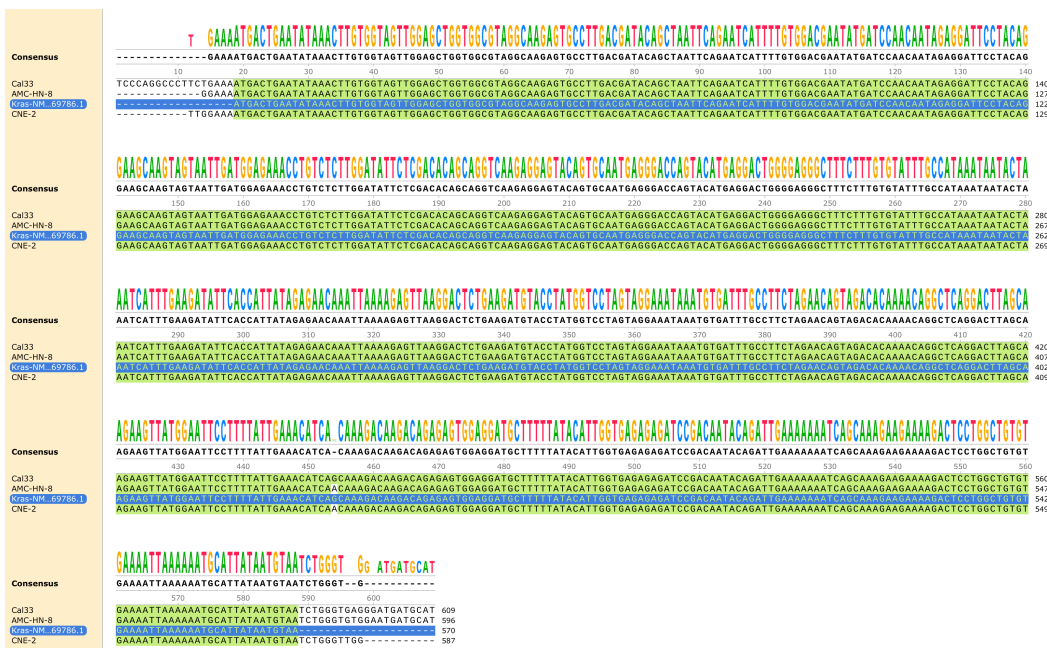

B

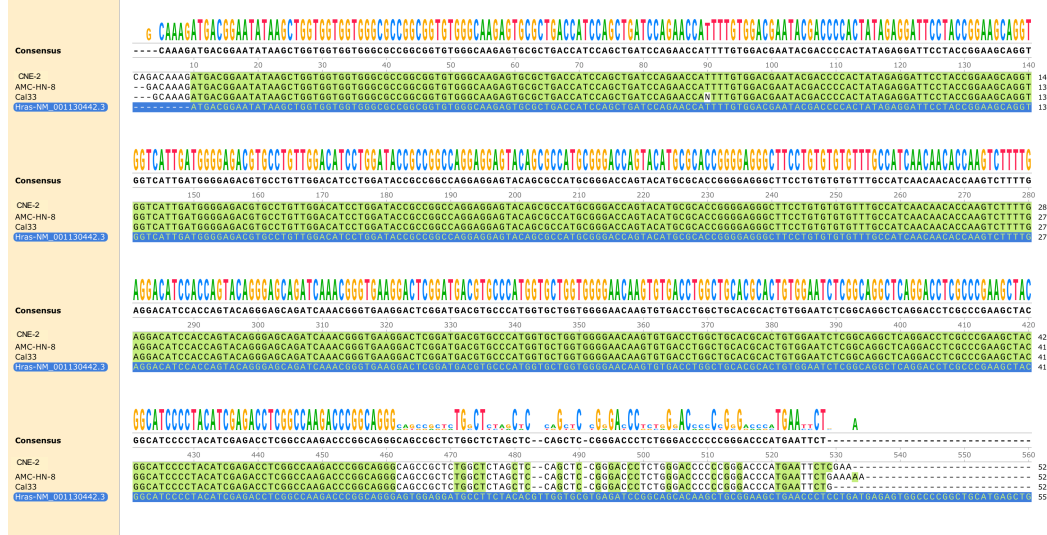

C

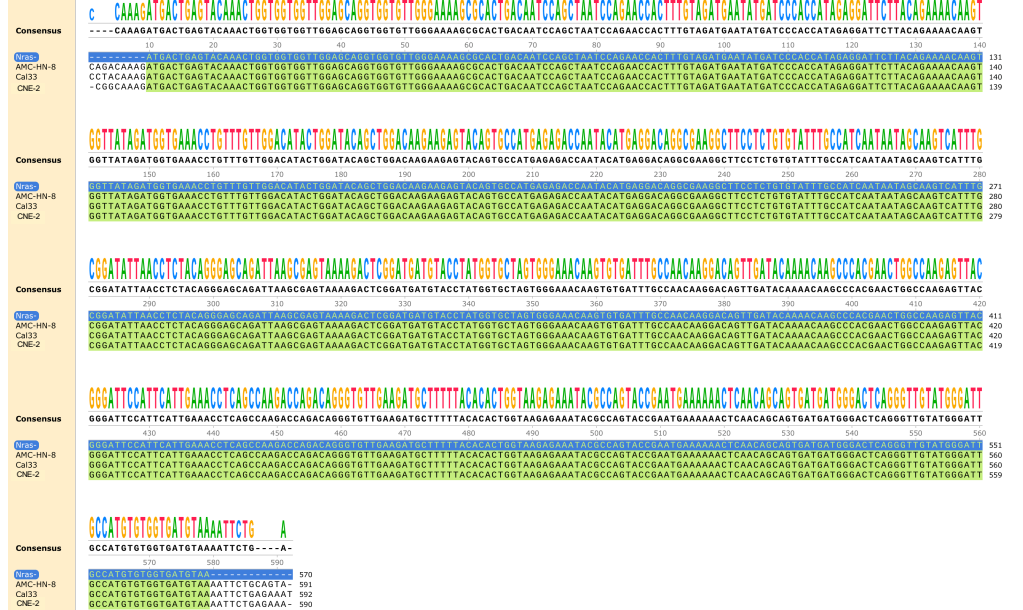

**Supplement Table S1 Primers' sequences**

| Primers  | 5'→3'                   |
|----------|-------------------------|
| qGAPDH-F | GTCTCCTCTGACTTCAACAGCG  |
| qGAPDH-R | ACCACCCTGTTGCTGTAGCCAA  |
| qKRAS-F  | TGTGGACGAATATGATCCAACA  |
| qKRAS-R  | GCAAATACACAAAGAAAGCCCT  |
| qNRAS-F  | GAAACCTCAGCCAAGACCAGAC  |
| qNRAS-R  | GGCAATCCCATAACAACCCTGAG |
| qHRAS-F  | ACGCACTGTGGAATCTCGGCAG  |
| qHRAS-R  | TCACGCACCAACGTGTAGAAGG  |
| qTF-F    | GTACTCCAAGTTTCTGATGCAC  |
| qTF-R    | CTCTTGATGACAAACTGGATGC  |
| qTFRC-F  | ATCGGTTGGTGCCACTGAATGG  |
| qTFRC-R  | ACAACAGTGGGCTGGCAGAAAC  |
| qAURKA-F | GCAACCAGTGTACCTCATCCTG  |
| qAURKA-R | AAGTCTTCCAAAGCCCCTG     |
| qFTH-F   | TGAAGCTGCAGAACCAACGAGG  |
| qFTH-R   | GCACACTCCATTGCATTTCAGCC |
| qEGFR-F  | AACACCCTGGTCTGGAAGTACG  |
| qEGFR-R  | TCGTTGGACAGCCTTCAAGACC  |
